# Supplementary material
Source: publisher figshare collection journal article supplement (https://gsajournals.figshare.com/articles/dataset/_/11918424)
Supplement: Supplementary file 1 [file 1]

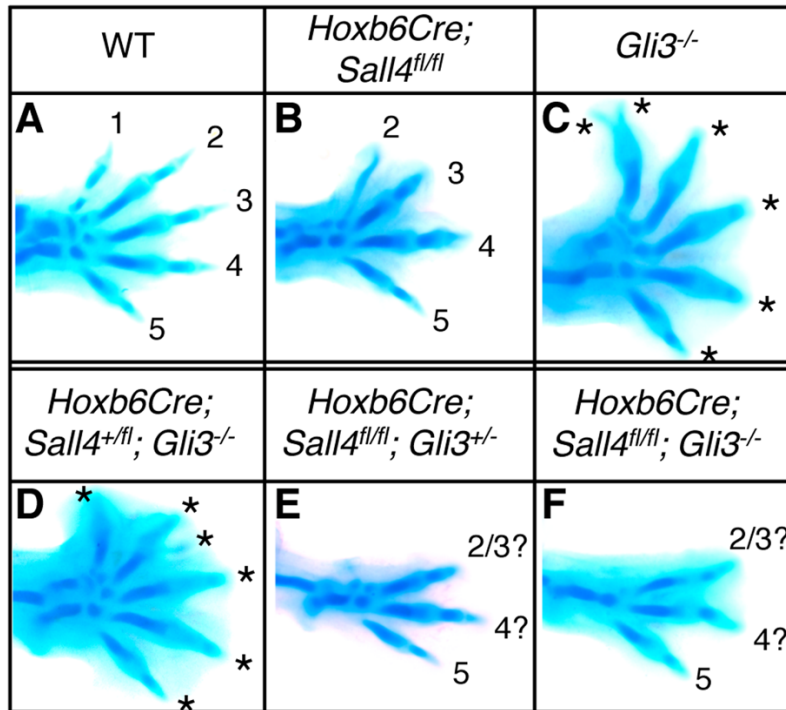

**Figure S4 Dorsal views of the autopod region of E14.5 embryos**

Dorsal views of the hindlimb autopod region with the indicated genotypes. In the autopod, 1-5 at the digit tip indicates d1 – d5. Asterisk in C and D indicates tip of digits whose identity is not clear. The 2/3? and 4? in E and F indicate two digits that appear to be digit 2 or 3 and 4, respectively.
