# Supplementary material
Source: publisher figshare collection journal article supplement (https://gsajournals.figshare.com/articles/dataset/_/11918424)
Supplement: Supplementary file 2 [file 1]

| Genotype                                                                         | Forelimb                                                                            |
|----------------------------------------------------------------------------------|-------------------------------------------------------------------------------------|
| Wild Type                                                                        | 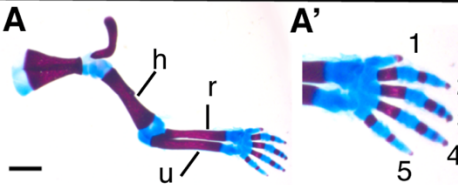   |
| <i>Hoxb6Cre</i> ;<br><i>Sall4<sup>fl/fl</sup></i>                                |    |
| <i>Plzf<sup>-/-</sup></i>                                                        |    |
| <i>Hoxb6Cre</i> ;<br><i>Sall4<sup>+fl</sup></i> ;<br><i>Plzf<sup>-/-</sup></i>   |   |
| <i>Hoxb6Cre</i> ;<br><i>Sall4<sup>fl/fl</sup></i> ;<br><i>Plzf<sup>+/-</sup></i> |  |
| <i>Hoxb6Cre</i> ;<br><i>Sall4<sup>fl/fl</sup></i> ;<br><i>Plzf<sup>-/-</sup></i> |  |

**Figure S2 Forelimb skeletons of *Sall4*; *Plzf* allelic series.**

(A-F) Forelimb skeletons of indicated genotypes. A' – F' show a close up of the autopod region.

1-5 at the digit tip in A' indicates each digit. Abbreviations. aut: autopod, h: humerus, r: radius, u: ulna. Scale bar in A = 1 mm.
