# Supplementary material
Source: publisher figshare collection journal article supplement (https://gsajournals.figshare.com/articles/dataset/_/11918424)
Supplement: Supplementary file 3 [file 1]

**Table S1      Summary of phenotypic scoring**

|        | Phenotype                   | Wild Type | <i>Hoxb6Cre<sup>+Tg</sup>;<br/>Sall4<sup>fl/fl</sup></i> | <i>Plzf<sup>e/-</sup></i> | <i>Hoxb6Cre<sup>+Tg</sup>;<br/>Sall4<sup>+fl</sup>; Plzf<sup>e/-</sup></i> | <i>Hoxb6Cre<sup>+Tg</sup>;<br/>Sall4<sup>fl/fl</sup>; Plzf<sup>e/-</sup></i> | <i>Hoxb6Cre<sup>+Tg</sup>;<br/>Sall4<sup>fl/fl</sup>; Plzf<sup>e/-</sup></i> |
|--------|-----------------------------|-----------|----------------------------------------------------------|---------------------------|----------------------------------------------------------------------------|------------------------------------------------------------------------------|------------------------------------------------------------------------------|
| n =    |                             | 50        | 58                                                       | 42                        | 26                                                                         | 60                                                                           | 22                                                                           |
| Femur  | Normal                      | 50        | 56                                                       | 30                        | 22                                                                         | 45                                                                           | 4                                                                            |
|        | Short                       | 0         | 2                                                        | 12                        | 4                                                                          | 14                                                                           | 9                                                                            |
|        | Cartilage aggregate         | 0         | 0                                                        | 0                         | 0                                                                          | 1                                                                            | 9                                                                            |
| Tibia  | Normal                      | 50        | 43                                                       | 0                         | 0                                                                          | 28                                                                           | 0                                                                            |
|        | Thin and short              | 0         | 8                                                        | 38                        | 19                                                                         | 14                                                                           | 4                                                                            |
|        | Missing                     | 0         | 7                                                        | 4                         | 7                                                                          | 18                                                                           | 18                                                                           |
| Fibula | Normal                      | 50        | 58                                                       | 10                        | 12                                                                         | 48                                                                           | 2                                                                            |
|        | short                       | 0         | 0                                                        | 32                        | 14                                                                         | 12                                                                           | 10                                                                           |
|        | Small cartilage             | 0         | 0                                                        | 0                         | 0                                                                          | 0                                                                            | 10                                                                           |
| Digit  | Normal                      | 50        | 13                                                       | 3                         | 10                                                                         | 10                                                                           | 1                                                                            |
|        | 4 Digits                    | 0         | 42                                                       | 1                         | 9                                                                          | 34                                                                           | 0                                                                            |
|        | 3 Digits                    | 0         | 3                                                        | 0                         | 0                                                                          | 6                                                                            | 12                                                                           |
|        | 2 Digits                    | 0         | 0                                                        | 0                         | 0                                                                          | 0                                                                            | 6                                                                            |
|        | Triphalangeal d1            | 0         | 0                                                        | 32                        | 7                                                                          | 6                                                                            | 3                                                                            |
|        | Triphalangeal d1 & Extra d1 | 0         | 0                                                        | 6                         | 0                                                                          | 5                                                                            | 0                                                                            |
