# Supplementary material
Source: publisher figshare collection journal article supplement (https://gsajournals.figshare.com/articles/dataset/_/11918424)
Supplement: Supplementary file 4 [file 1]

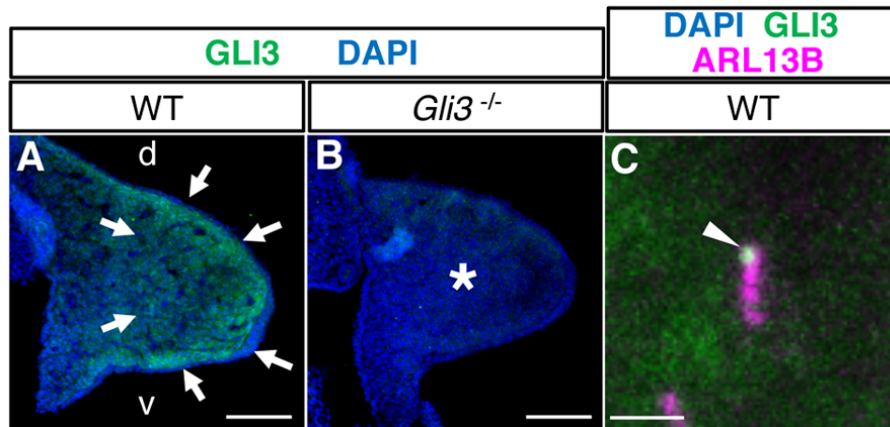

**Figure S3 Validation of anti-GLI3 antibody by immunofluorescence.**

(A, B) GLI3 immunofluorescence on sections of wild-type (A) and *Gli3*<sup>-/-</sup> (B) hindlimb buds at E10.5. Arrows point to GLI3 expression in wild-type hindlimb buds (A), which was not detected in *Gli3*<sup>-/-</sup> hindlimb buds (B).

(C) GLI3 localization at the tip of a cilium (pointed by an arrowhead) in hindlimb buds.

ARL13B stains cilia.

d: dorsal, v: ventral. Scale bar in A, B = 10  $\mu$ m. Scale bar in C = 2  $\mu$ m.
