# Supplementary material
Source: publisher figshare collection journal article supplement (https://gsajournals.figshare.com/articles/dataset/_/11918424)
Supplement: Supplementary file 5 [file 1]

**Table S3 Summary of femur defects in *Sall4*; *Gli3* allelic series**

| Phenotype                    | <i>Hoxb6Cre</i> <sup>+/tg</sup> ;<br><i>Sall4</i> <sup>fl/fl</sup> | <i>Gli3</i> <sup>-/-</sup> | <i>Hoxb6Cre</i> <sup>+/tg</sup> ;<br><i>Sall4</i> <sup>fl/fl</sup> ; <i>Gli3</i> <sup>+/-</sup> | <i>Hoxb6Cre</i> <sup>+/tg</sup> ;<br><i>Sall4</i> <sup>+/fl</sup> ; <i>Gli3</i> <sup>-/-</sup> | <i>Hoxb6Cre</i> <sup>+/tg</sup> ;<br><i>Sall4</i> <sup>fl/fl</sup> ; <i>Gli3</i> <sup>-/-</sup> |
|------------------------------|--------------------------------------------------------------------|----------------------------|-------------------------------------------------------------------------------------------------|------------------------------------------------------------------------------------------------|-------------------------------------------------------------------------------------------------|
| Elongated                    | 82                                                                 | 28                         | 24 <sup>#</sup>                                                                                 | 12                                                                                             | 10 <sup>*</sup>                                                                                 |
| Small cartilage<br>aggregate | 0                                                                  | 0                          | 0                                                                                               | 0                                                                                              | 2                                                                                               |
| Total number                 | 82                                                                 | 28                         | 24                                                                                              | 12                                                                                             | 12                                                                                              |

Numbers indicate numbers of limbs at E13.5 – 16.5.

<sup>#</sup>: The middle part of the femur was very thin, n=4

<sup>\*</sup>: The middle part of the femur lacked Alcian Blue staining, n=4.
