# Supplementary material
Source: publisher figshare collection journal article supplement (https://gsajournals.figshare.com/articles/dataset/_/11918424)
Supplement: Supplementary file 6 [file 1]

**Table S2 Statistical examination of skeletal phenotypes in the allelic series of *Sall4*; *Plzf* mutants**

For simplicity of presentation, *Hoxb6Cre*<sup>+/Tg</sup> is not shown in the following genotypes in the table. *Hoxb6Cre*<sup>+/Tg</sup>; *Sall4*<sup>fl/fl</sup>, *Hoxb6Cre*<sup>+/Tg</sup>; *Sall4*<sup>+/fl</sup>; *Plzf*<sup>-/-</sup>, *Hoxb6Cre*<sup>+/Tg</sup>; *Sall4*<sup>fl/fl</sup>; *Plzf*<sup>+/+</sup>, *Hoxb6Cre*<sup>+/Tg</sup>; *Sall4*<sup>fl/fl</sup>; *Plzf*<sup>-/-</sup>.

|                                                                 |                                                                                     |          |                 |
|-----------------------------------------------------------------|-------------------------------------------------------------------------------------|----------|-----------------|
| Hypothesis 1                                                    | In the femur, the ratio of small cartilage aggregate in each genotype is different. |          |                 |
| The p value of Fisher test of independence for the entire group |                                                                                     |          | <.001(4.09E-10) |
| Pairwise test by Fisher's exact test                            |                                                                                     |          |                 |
| Tested pairs                                                    |                                                                                     | P value  | Significant?    |
| Wild type                                                       | <i>Sall4</i> <sup>fl/fl</sup>                                                       | 1        | No              |
| Wild type                                                       | <i>Plzf</i> <sup>-/-</sup>                                                          | 1        | No              |
| Wild type                                                       | <i>Sall4</i> <sup>+/fl</sup> ; <i>Plzf</i> <sup>-/-</sup>                           | 1        | No              |
| Wild type                                                       | <i>Sall4</i> <sup>fl/fl</sup> ; <i>Plzf</i> <sup>+/+</sup>                          | 1        | No              |
| Wild type                                                       | <i>Sall4</i> <sup>fl/fl</sup> ; <i>Plzf</i> <sup>-/-</sup>                          | 5.84E-06 | Yes             |
| <i>Sall4</i> <sup>fl/fl</sup>                                   | <i>Plzf</i> <sup>-/-</sup>                                                          | 1        | No              |
| <i>Sall4</i> <sup>fl/fl</sup>                                   | <i>Sall4</i> <sup>+/fl</sup> ; <i>Plzf</i> <sup>-/-</sup>                           | 1        | No              |
| <i>Sall4</i> <sup>fl/fl</sup>                                   | <i>Sall4</i> <sup>fl/fl</sup> ; <i>Plzf</i> <sup>+/+</sup>                          | 1        | No              |
| <i>Sall4</i> <sup>fl/fl</sup>                                   | <i>Sall4</i> <sup>fl/fl</sup> ; <i>Plzf</i> <sup>-/-</sup>                          | 2.14E-06 | Yes             |
| <i>Plzf</i> <sup>-/-</sup>                                      | <i>Sall4</i> <sup>+/fl</sup> ; <i>Plzf</i> <sup>-/-</sup>                           | 1        | No              |
| <i>Plzf</i> <sup>-/-</sup>                                      | <i>Sall4</i> <sup>fl/fl</sup> ; <i>Plzf</i> <sup>+/+</sup>                          | 1        | No              |
| <i>Plzf</i> <sup>-/-</sup>                                      | <i>Sall4</i> <sup>fl/fl</sup> ; <i>Plzf</i> <sup>-/-</sup>                          | 1.81E-04 | Yes             |
| <i>Sall4</i> <sup>+/fl</sup> ; <i>Plzf</i> <sup>-/-</sup>       | <i>Sall4</i> <sup>fl/fl</sup> ; <i>Plzf</i> <sup>+/+</sup>                          | 1        | No              |
| <i>Sall4</i> <sup>+/fl</sup> ; <i>Plzf</i> <sup>-/-</sup>       | <i>Sall4</i> <sup>fl/fl</sup> ; <i>Plzf</i> <sup>-/-</sup>                          | 2.97E-04 | Yes             |
| <i>Sall4</i> <sup>fl/fl</sup> ; <i>Plzf</i> <sup>+/+</sup>      | <i>Sall4</i> <sup>fl/fl</sup> ; <i>Plzf</i> <sup>-/-</sup>                          | 1.43E-05 | Yes             |

|                                                                 |                                                                     |          |                  |
|-----------------------------------------------------------------|---------------------------------------------------------------------|----------|------------------|
| Hypothesis 2                                                    | In the tibia, the ratio of "missing" in each genotype is different. |          |                  |
| The p value of Fisher test of independence for the entire group |                                                                     |          | <.001(7.157E-14) |
| Pairwise test by Fisher's exact test                            |                                                                     |          |                  |
| Tested pairs                                                    |                                                                     | P value  | Significant?     |
| Wild type                                                       | <i>Sall4</i> <sup>fl/fl</sup>                                       | 0.0144   | No               |
| Wild type                                                       | <i>Plzf</i> <sup>-/-</sup>                                          | 0.0401   | No               |
| Wild type                                                       | <i>Sall4</i> <sup>+/fl</sup> ; <i>Plzf</i> <sup>-/-</sup>           | 3.01E-04 | Yes              |
| Wild type                                                       | <i>Sall4</i> <sup>fl/fl</sup> ; <i>Plzf</i> <sup>+/+</sup>          | 7.69E-06 | Yes              |
| Wild type                                                       | <i>Sall4</i> <sup>fl/fl</sup> ; <i>Plzf</i> <sup>-/-</sup>          | 1.77E-13 | Yes              |
| <i>Sall4</i> <sup>fl/fl</sup>                                   | <i>Plzf</i> <sup>-/-</sup>                                          | 0.757    | No               |
| <i>Sall4</i> <sup>fl/fl</sup>                                   | <i>Sall4</i> <sup>+/fl</sup> ; <i>Plzf</i> <sup>-/-</sup>           | 0.117    | No               |
| <i>Sall4</i> <sup>fl/fl</sup>                                   | <i>Sall4</i> <sup>fl/fl</sup> ; <i>Plzf</i> <sup>+/+</sup>          | 0.0236   | No               |
| <i>Sall4</i> <sup>fl/fl</sup>                                   | <i>Sall4</i> <sup>fl/fl</sup> ; <i>Plzf</i> <sup>-/-</sup>          | 6.23E-09 | Yes              |
| <i>Plzf</i> <sup>-/-</sup>                                      | <i>Sall4</i> <sup>+/fl</sup> ; <i>Plzf</i> <sup>-/-</sup>           | 0.0893   | No               |
| <i>Plzf</i> <sup>-/-</sup>                                      | <i>Sall4</i> <sup>fl/fl</sup> ; <i>Plzf</i> <sup>+/+</sup>          | 0.0150   | No               |
| <i>Plzf</i> <sup>-/-</sup>                                      | <i>Sall4</i> <sup>fl/fl</sup> ; <i>Plzf</i> <sup>-/-</sup>          | 1.04E-08 | Yes              |
| <i>Sall4</i> <sup>+/fl</sup> ; <i>Plzf</i> <sup>-/-</sup>       | <i>Sall4</i> <sup>fl/fl</sup> ; <i>Plzf</i> <sup>+/+</sup>          | 1        | No               |
| <i>Sall4</i> <sup>+/fl</sup> ; <i>Plzf</i> <sup>-/-</sup>       | <i>Sall4</i> <sup>fl/fl</sup> ; <i>Plzf</i> <sup>-/-</sup>          | 1.84E-04 | Yes              |
| <i>Sall4</i> <sup>fl/fl</sup> ; <i>Plzf</i> <sup>+/+</sup>      | <i>Sall4</i> <sup>fl/fl</sup> ; <i>Plzf</i> <sup>-/-</sup>          | 3.69E-05 | Yes              |

|                                                                 |                                                                            |          |                  |
|-----------------------------------------------------------------|----------------------------------------------------------------------------|----------|------------------|
| Hypothesis 3                                                    | In the fibula, the ratio of small cartilage in each genotype is different. |          |                  |
| The p value of Fisher test of independence for the entire group |                                                                            |          | <.001(2.143E-12) |
| Pairwise test by Fisher's exact test                            |                                                                            |          |                  |
| Tested pairs                                                    |                                                                            | P value  | Significant?     |
| Wild type                                                       | <i>Sall4<sup>fl/fl</sup></i>                                               | 1        | No               |
| Wild type                                                       | <i>Plzf<sup>f/-</sup></i>                                                  | 1        | No               |
| Wild type                                                       | <i>Sall4<sup>+/fl</sup>; Plzf<sup>f/-</sup></i>                            | 1        | No               |
| Wild type                                                       | <i>Sall4<sup>fl/fl</sup>; Plzf<sup>f/-</sup></i>                           | 1        | No               |
| Wild type                                                       | <i>Sall4<sup>fl/fl</sup>; Plzf<sup>f/-</sup></i>                           | 1.21E-06 | Yes              |
| <i>Sall4<sup>fl/fl</sup></i>                                    | <i>Plzf<sup>f/-</sup></i>                                                  | 1        | No               |
| <i>Sall4<sup>fl/fl</sup></i>                                    | <i>Sall4<sup>+/fl</sup>; Plzf<sup>f/-</sup></i>                            | 1        | No               |
| <i>Sall4<sup>fl/fl</sup></i>                                    | <i>Sall4<sup>fl/fl</sup>; Plzf<sup>f/-</sup></i>                           | 1        | No               |
| <i>Sall4<sup>fl/fl</sup></i>                                    | <i>Sall4<sup>fl/fl</sup>; Plzf<sup>f/-</sup></i>                           | 3.93E-07 | Yes              |
| <i>Plzf<sup>f/-</sup></i>                                       | <i>Sall4<sup>+/fl</sup>; Plzf<sup>f/-</sup></i>                            | 1        | No               |
| <i>Plzf<sup>f/-</sup></i>                                       | <i>Sall4<sup>fl/fl</sup>; Plzf<sup>f/-</sup></i>                           | 1        | No               |
| <i>Plzf<sup>f/-</sup></i>                                       | <i>Sall4<sup>fl/fl</sup>; Plzf<sup>f/-</sup></i>                           | 4.27E-06 | Yes              |
| <i>Sall4<sup>+/fl</sup>; Plzf<sup>f/-</sup></i>                 | <i>Sall4<sup>fl/fl</sup>; Plzf<sup>f/-</sup></i>                           | 1        | No               |
| <i>Sall4<sup>+/fl</sup>; Plzf<sup>f/-</sup></i>                 | <i>Sall4<sup>fl/fl</sup>; Plzf<sup>f/-</sup></i>                           | 9.89E-05 | Yes              |
| <i>Sall4<sup>fl/fl</sup>; Plzf<sup>f/-</sup></i>                | <i>Sall4<sup>fl/fl</sup>; Plzf<sup>f/-</sup></i>                           | 3.02E-07 | Yes              |

|                                                                 |                                                                                                  |          |              |
|-----------------------------------------------------------------|--------------------------------------------------------------------------------------------------|----------|--------------|
| Hypothesis 4                                                    | In the autopod, the ratio of loss of more than 2 digits phenotype in each genotype is different. |          |              |
| The p value of Fisher test of independence for the entire group |                                                                                                  |          | < 2.2e-16    |
| Pairwise test by Fisher's exact test                            |                                                                                                  |          |              |
| Tested pairs                                                    |                                                                                                  | P value  | Significant? |
| Wild type                                                       | <i>Sall4<sup>fl/fl</sup></i>                                                                     | 0.247    | No           |
| Wild type                                                       | <i>Plzf<sup>f/-</sup></i>                                                                        | 1        | No           |
| Wild type                                                       | <i>Sall4<sup>+/fl</sup>; Plzf<sup>f/-</sup></i>                                                  | 1        | No           |
| Wild type                                                       | <i>Sall4<sup>fl/fl</sup>; Plzf<sup>f/-</sup></i>                                                 | 0.0308   | No           |
| Wild type                                                       | <i>Sall4<sup>fl/fl</sup>; Plzf<sup>f/-</sup></i>                                                 | 1.77E-13 | Yes          |
| <i>Sall4<sup>fl/fl</sup></i>                                    | <i>Plzf<sup>f/-</sup></i>                                                                        | 0.262    | No           |
| <i>Sall4<sup>fl/fl</sup></i>                                    | <i>Sall4<sup>+/fl</sup>; Plzf<sup>f/-</sup></i>                                                  | 0.549    | No           |
| <i>Sall4<sup>fl/fl</sup></i>                                    | <i>Sall4<sup>fl/fl</sup>; Plzf<sup>f/-</sup></i>                                                 | 0.491    | No           |
| <i>Sall4<sup>fl/fl</sup></i>                                    | <i>Sall4<sup>fl/fl</sup>; Plzf<sup>f/-</sup></i>                                                 | 2.26E-11 | Yes          |
| <i>Plzf<sup>f/-</sup></i>                                       | <i>Sall4<sup>+/fl</sup>; Plzf<sup>f/-</sup></i>                                                  | 1        | No           |
| <i>Plzf<sup>f/-</sup></i>                                       | <i>Sall4<sup>fl/fl</sup>; Plzf<sup>f/-</sup></i>                                                 | 0.0411   | No           |
| <i>Plzf<sup>f/-</sup></i>                                       | <i>Sall4<sup>fl/fl</sup>; Plzf<sup>f/-</sup></i>                                                 | 2.03E-12 | Yes          |
| <i>Sall4<sup>+/fl</sup>; Plzf<sup>f/-</sup></i>                 | <i>Sall4<sup>fl/fl</sup>; Plzf<sup>f/-</sup></i>                                                 | 0.172    | No           |
| <i>Sall4<sup>+/fl</sup>; Plzf<sup>f/-</sup></i>                 | <i>Sall4<sup>fl/fl</sup>; Plzf<sup>f/-</sup></i>                                                 | 1.00E-09 | Yes          |
| <i>Sall4<sup>fl/fl</sup>; Plzf<sup>f/-</sup></i>                | <i>Sall4<sup>fl/fl</sup>; Plzf<sup>f/-</sup></i>                                                 | 1.15E-09 | Yes          |
