# Supplementary material
Source: publisher figshare collection journal article supplement (https://gsajournals.figshare.com/articles/dataset/_/11918424)
Supplement: Supplementary file 7 [file 1]

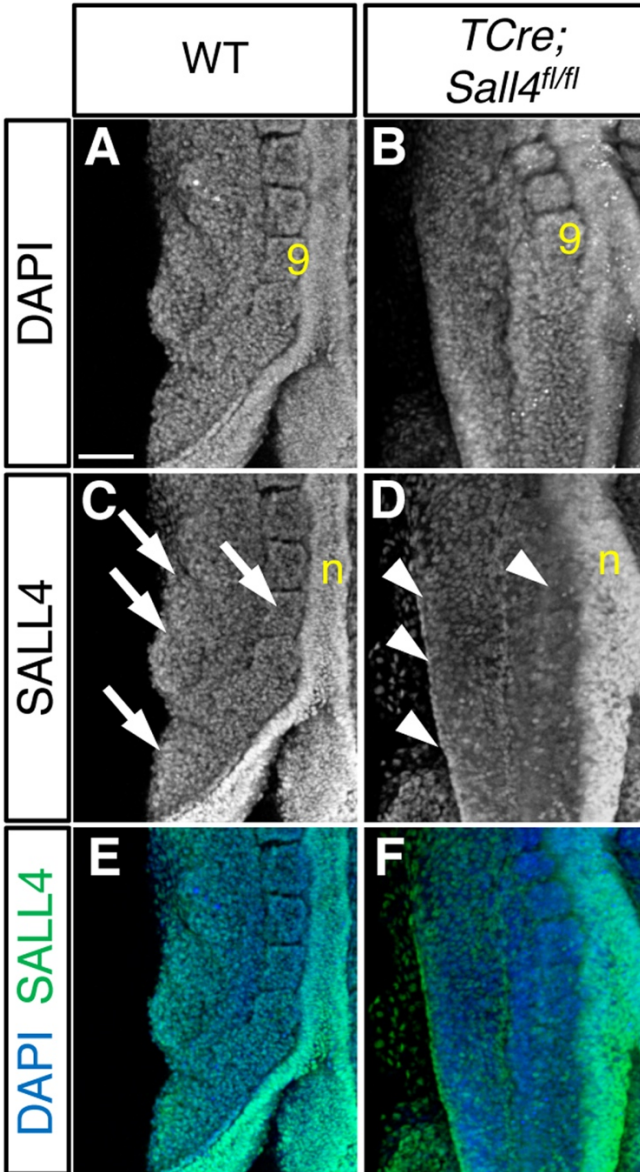

**Figure S1 SALL4 immunoreactivities in the forelimb forming region at E8.5**

Dorsal views of the wild type (A, C, E) and *TCre; Sall4* cKO (B, D, F) embryos at E8.5. The forelimb bud-forming region and tissues lateral to it (somites, neural tube) are shown. DAPI, SALL4 and merged signals are shown. Yellow numbers in A and B indicate the position and the somite number formed at the most posterior of each embryo. Arrows in C point to SALL4 signals in the LPM and somites. Arrowheads in D point to reduced SALL4 signals. n: neural tissue. Scale bar = 100  $\mu$ m.
