# Supplementary material
Source: publisher figshare collection journal article supplement (https://gsajournals.figshare.com/articles/dataset/_/11918424)
Supplement: Supplementary file 8 [file 1]

**Table S4 Statistical examination of the loss of digit phenotype in hindlimbs between *Hoxb6Cre<sup>+tg</sup>*; *Sall4<sup>fl/fl</sup>* and *Hoxb6Cre<sup>+tg</sup>*; *Sall4<sup>fl/fl</sup>*; *Shh<sup>+fl</sup>***

| Digit number | <i>Hoxb6Cre<sup>+tg</sup></i> ; <i>Sall4<sup>fl/fl</sup></i> | <i>Hoxb6Cre<sup>+tg</sup></i> ; <i>Sall4<sup>fl/fl</sup></i> ; <i>Shh<sup>+fl</sup></i> |
|--------------|--------------------------------------------------------------|-----------------------------------------------------------------------------------------|
| 5            | 26                                                           | 30                                                                                      |
| 4+Small d1   | 0                                                            | 5                                                                                       |
| 4            | 43                                                           | 11                                                                                      |
| 3            | 13                                                           | 2                                                                                       |
| 2            | 0                                                            | 0                                                                                       |
| Total        | 82                                                           | 48                                                                                      |

Hypothesis: The ratio of samples with 5 digits is different between *Hoxb6Cre<sup>+tg</sup>*; *Sall4<sup>fl/fl</sup>* and *Hoxb6Cre<sup>+tg</sup>*; *Sall4<sup>fl/fl</sup>*; *Shh<sup>+fl</sup>*

p = 0.0008959 by Fisher Exact Test
